# Supplementary material for: Trends in the Cumulative Post-Marketing Reporting Rates of Retinal Vasculitis and/or Retinal Vascular Occlusion and Associated Vision Loss with Brolucizumab
Source: PubMed Central journal article supplement — Ophthalmol Ther. 2022 Dec 5;12(1):593–8. doi: 10.1007/s40123-022-00617-5 (PMC9834481; doi:10.1007/s40123-022-00617-5), 2022-12-05
Supplement: 40123_2022_617_MOESM1_ESM.pdf [file 40123_2022_617_MOESM1_ESM.pdf]

**Title: Trends in the Cumulative Post-Marketing Reporting Rates of Retinal Vasculitis and/or Retinal Vascular Occlusion and Associated Vision Loss with Brolucizumab**

**Authors:** Franklin Igwe<sup>1</sup>, Amit Lodha<sup>2</sup>, Arun Ravindran<sup>3</sup>

**Author Affiliations:**

1. Novartis Pharma A.G., Basel, Switzerland.
2. Novartis Pharmaceuticals Corp., East Hanover, USA.
3. Novartis Healthcare Private Limited, Hyderabad, India.

**Corresponding Author:**

Franklin Igwe

Novartis Pharma A.G., Basel, Switzerland.

Tel : +41796376456

Email : [franklin.igwe@novartis.com](mailto:franklin.igwe@novartis.com)

**Supplementary Material:** The cumulative post-marketing reporting rates of RV and/or RO and associated vision loss per 10,000 injections are available in Table S1.

**Table S1: Cumulative post-marketing reporting rates of RV and/or RO and associated vision loss per 10,000 injections**

| Date       | Vision loss | RV  | RO  | RV and RO |
|------------|-------------|-----|-----|-----------|
| 08/05/2020 | -           | 1.7 | 1.6 | 3.7       |
| 05/06/2020 | -           | 2.0 | 2.5 | 4.2       |
| 26/06/2020 | 2.4         | 2.0 | 1.8 | 4.2       |
| 24/07/2020 | 3.1         | 2.7 | 2.6 | 4.8       |
| 28/08/2020 | 3.5         | 3.6 | 2.4 | 4.7       |
| 25/09/2020 | 4.9         | 4.5 | 3.0 | 6.1       |
| 23/10/2020 | 5.1         | 5.1 | 3.2 | 6.1       |
| 20/11/2020 | 5.6         | 5.1 | 3.2 | 7.2       |
| 18/12/2020 | 5.9         | 5.0 | 3.3 | 7.5       |
| 15/01/2021 | 5.9         | 4.5 | 3.4 | 7.4       |
| 12/02/2021 | 5.7         | 4.9 | 3.4 | 7.1       |
| 12/03/2021 | 5.5         | 5.1 | 3.4 | 7.2       |
| 09/04/2021 | 5.4         | 4.5 | 3.4 | 7.0       |
| 07/05/2021 | 5.3         | 4.9 | 3.2 | 7.4       |
| 04/06/2021 | 5.2         | 5.0 | 3.4 | 7.0       |
| 02/07/2021 | 5.0         | 5.0 | 3.4 | 7.2       |
| 30/07/2021 | 5.2         | 4.9 | 3.4 | 7.2       |
| 27/08/2021 | 4.9         | 5.1 | 3.0 | 7.0       |
| 24/09/2021 | 4.9         | 5.4 | 3.3 | 7.0       |
| 22/10/2021 | 4.8         | 5.6 | 3.2 | 6.7       |
| 19/11/2021 | 4.7         | 5.6 | 3.2 | 6.7       |

|            |     |     |     |     |
|------------|-----|-----|-----|-----|
| 11/03/2022 | 4.7 | 5.6 | 3.3 | 6.6 |
| 03/06/2022 | 4.2 | 5.5 | 3.0 | 5.9 |
| 02/09/2022 | 4.1 | 5.6 | 3.1 | 5.5 |

RO, retinal vascular occlusion; RV, retinal vasculitis.
